# Supplementary material
Source: PubMed Central journal article supplement (PMC4455970)
Supplement: NIHMS689451-supplement-Supplementary_Information.pdf [file NIHMS689451-supplement-Supplementary_Information.pdf]

**Supplementary table 1: Product examples for half-life extension / decreased dosing frequency**

**Products based on depot formulations**

| Parent drug          | Drug/carrier                                                                 | Indication                                                                        | Commercial Stage                 |
|----------------------|------------------------------------------------------------------------------|-----------------------------------------------------------------------------------|----------------------------------|
| Goserelin            | Goserelin acetate implant / PLGA (Zoladex)                                   | Prostate cancer                                                                   | Approved 1989                    |
| Leuprolide           | Leuprolide acetate for depot suspension / PLGA (Lupron Depot)                | Prostate cancer; endometriosis; uterine fibroids                                  | Approved 1989                    |
| Octreotide           | Octreotide acetate for injectable suspension / PLGA (Sandostatin LAR)        | Acromegaly                                                                        | Approved 1998                    |
| Lanreotide           | Lanreotide / PLGA (Somatuline LA)                                            | Acromegaly; Thyrotropic Adenomas; Neuroendocrine Tumours                          | Approved 1998                    |
| Human growth hormone | Somatropin for injectable suspension / PLGA (Nutropin Depot)                 | Growth hormone deficiency in pediatric patients                                   | Approved 1999; discontinued 2004 |
| Buserelin            | Buserelin / PLGA (Suprefact Depot)                                           | Prostate cancer; endometriosis                                                    | Approved 2000                    |
| Triptorelin          | Triptorelin / PLGA (Decapeptyl SR)                                           | Prostate cancer                                                                   | Approved 2000                    |
| Triptorelin pamoate  | Triptorelin pamoate for injectable suspension/ PLGA (Trelstar)               | Prostate cancer                                                                   | Approved 2000                    |
| Leuprolide           | Leuprolide acetate implant/PLGA(Viadur )                                     | Prostate cancer                                                                   | Approved 2000                    |
| BMP-7                | Eptotermin alfa/Collagen(Osigraft)                                           | For the treatment of tibial nonunions where autograft has failed or is unfeasible | Approved 2001                    |
| Leuprolide           | Leuprolide acetate for injectable suspension/ PLGA (Eligard)                 | Prostate cancer                                                                   | Approved 2002                    |
| BMP-2                | rhBMP-2/ACS /Collagen(INFUSE BoneGraft)                                      | For use in anterior lumbar interbody spinal fusion procedures                     | Approved 2002                    |
| Abarelix             | Abarelix depot for injectable suspension / carboxymethylcellulose (Plenaxis) | Prostate cancer                                                                   | Approved 2003; discontinued 2006 |
| Exenatide            | Exenatide extended release for injectable suspension / PLGA (Bydureon)       | Type 2 diabetes                                                                   | Approved 2012                    |
| Pasireotide          | Pasireotide pamoate / PLGA (Signifor)                                        | Acromegaly                                                                        | Phase III                        |
| Human growth hormone | SR-hGH, LB03002 / hyaluronic acid                                            | Pediatric Growth Hormone Deficiency; Adult Growth Hormone Deficiency              | Phase III                        |
| Leuprolide           | Fluid Crystal leuprolide acetate / Lipid (Prosenze, CAM2032)                 | Prostate cancer; endometriosis                                                    | Phase II                         |
| IFN-alpha            | Controlled release interferon alpha 2b/ poly (ether ester) (Locteron)        | Hepatitis C                                                                       | Phase II                         |
| IFN-alpha            | Medusa interferon alpha-2b XL / polyglutamate-vitamin E conjugate            | Hepatitis C                                                                       | Phase II                         |
| Interleukin-2        | Medusa IL-2XL / polyglutamate-vitamin E conjugate                            | Renal cell carcinoma                                                              | Phase I/II                       |
| Octreotide           | Fluid Crystal octreotide/ Lipid (CAM2029)                                    | Acromegaly; neuroendocrine tumors                                                 | Phase I                          |

Pegylated biopharmaceuticals

| Parent drug                     | Drug                                                                                  | Indication                                                           | Commercial Stage                 |
|---------------------------------|---------------------------------------------------------------------------------------|----------------------------------------------------------------------|----------------------------------|
| Adenosine deaminase             | Pegademase bovine (Adagen)                                                            | Severe combined immunodeficiency disease (SCID)                      | Approved 1990                    |
| L-Asparaginase                  | Pegaspargase (Oncaspar)                                                               | Acute lymphoblastic leukemia                                         | Approved 1994                    |
| Interferon a-2b                 | Peginterferon alfa-2b (Peg-Intron)                                                    | Hepatitis C                                                          | Approved 2000                    |
| Interferon a-2b                 | Peginterferon alfa-2b (Pegasys)                                                       | Hepatitis C                                                          | Approved 2002                    |
| G-CSF                           | Pegfilgrastim (Neulasta)                                                              | Chemotherapy-induced neutropenia                                     | Approved 2002                    |
| Human growth hormone antagonist | Pegvisomant (Somavert)                                                                | Acromegaly                                                           | Approved 2002                    |
| Erythropoietin                  | mPEG-epoetin beta (Mircera)                                                           | Anemia                                                               | Approved 2007                    |
| Anti-TNF Fab                    | Certolizumab pegol (Cimzia)                                                           | Crohn's disease                                                      | Approved 2008                    |
| Uricase                         | Pegloticase (Krystexxa)                                                               | Chronic gout                                                         | Approved 2010                    |
| EPO mimetic peptide             | Peginesatide, Hematide (Omontys)                                                      | Anemia                                                               | Approved 2012; discontinued 2013 |
| G-CSF                           | Lipegfilgrastim (Lonquex)                                                             | Chemotherapy-induced neutropenia                                     | Approved 2013 (in Europe)        |
| Interferon b-1a                 | Peginterferon beta-1a (Plegridy)                                                      | Relapsing-remitting multiple sclerosis (RRMS)                        | Phase III                        |
| Factor IX                       | PEG-rFIX N9-GP                                                                        | Hemophilia B                                                         | Phase III                        |
| Insulin                         | Peglispro, Basal insulin lispro, BIL                                                  | Type 1 and Type 2 diabetes                                           | Phase III                        |
| Consensus interferon            | Pegylated Recombinant Consensus Interferon Variant Solution for Injection, PEG-IFN-SA | Chronic Hepatitis C                                                  | Phase III                        |
| Factor VIII                     | Site-specific PEGylated recombinant human factor VIII, BAY 94-9027                    | Hemophilia A                                                         | Phase III                        |
| Tumor necrosis factor type I    | PEG sTNF-RI, Pegsunercept                                                             | Rheumatoid arthritis                                                 | Phase II                         |
| Phenylalanine ammonia lyase     | rAvPAL- PEG                                                                           | Phenylketonuria                                                      | Phase II                         |
| IL-29                           | PEG rIL-29                                                                            | Hepatitis C                                                          | Phase II                         |
| Anti-VEGF DARPIn                | Abicipar pegol                                                                        | Macular degeneration                                                 | Phase II                         |
| Human growth hormone            | TransCon PEG hGH, ACP-001                                                             | Pediatric Growth Hormone Deficiency; Adult Growth Hormone Deficiency | Phase II                         |
| Uricase                         | Pegsiticase, Uricase PEG-20                                                           | Gout                                                                 | Phase I                          |
| Human growth hormone            | Pegylated hGH, NNC126-0083                                                            | Adult Growth Hormone Deficiency                                      | Phase I                          |

**N-glycosylation and hyper-/polysialylation**

| Parent drug    | Drug                       | Indication | Commercial Stage |
|----------------|----------------------------|------------|------------------|
| Erythropoietin | Darbepoetin alfa (Aranesp) | Anemia     | Approved 2001    |
| Erythropoietin | PSA-EPO (ErepoXen)         | Anemia     | Phase II         |
| Insulin        | PSA-insulin (SuliXen)      | Diabetes   | Phase I          |

**Long-circulating biopharmaceuticals based on albumin**

| Parent drug                                                                                                                                                                                                                                                                                                                    | Drug                              | Indication                          | Commercial Stage              |
|--------------------------------------------------------------------------------------------------------------------------------------------------------------------------------------------------------------------------------------------------------------------------------------------------------------------------------|-----------------------------------|-------------------------------------|-------------------------------|
| <b>Albumin Fusion Proteins</b>                                                                                                                                                                                                                                                                                                 |                                   |                                     |                               |
| GLP-1 (7-36)                                                                                                                                                                                                                                                                                                                   | Albiglutide                       | Type 2 diabetes                     | Approved April 2014           |
| Interferon alpha-2b                                                                                                                                                                                                                                                                                                            | Albinterferon alfa-2b (Albuferon) | Hepatitis C                         | Phase III; discontinued 2010* |
| G-CSF                                                                                                                                                                                                                                                                                                                          | Neugranin                         | Chemotherapy-induced neutropenia    | Phase III                     |
| FVIII                                                                                                                                                                                                                                                                                                                          | rVIII-SingleChain                 | Hemophilia A                        | Phase III                     |
| FIX                                                                                                                                                                                                                                                                                                                            | rFIX-FP                           | Hemophilia B                        | Phase III                     |
| HER2 + HER3 specific single-chain Fv                                                                                                                                                                                                                                                                                           | MM-111 (scFv-HSA-scFv)            | Cancer                              | Phase II                      |
| Human growth hormone                                                                                                                                                                                                                                                                                                           | Albutropin, TV-1106               | Pediatric Growth Hormone Deficiency | Phase II                      |
| Extracellular EphB4                                                                                                                                                                                                                                                                                                            | sEphB4-HSA                        | Solid tumors                        | Phase I                       |
| FVIIa                                                                                                                                                                                                                                                                                                                          | rFVIIa-FP (CSL689)                | Hemophilia A or B                   | Phase I                       |
| Interferon beta                                                                                                                                                                                                                                                                                                                | Albuferon beta                    | Multiple sclerosis                  | Phase I                       |
| <b>Albumin binding through a conjugated fatty acid chain</b>                                                                                                                                                                                                                                                                   |                                   |                                     |                               |
| Insulin                                                                                                                                                                                                                                                                                                                        | Insulin detemir (Levemir)         | Diabetes                            | Approved 2005                 |
| Glucagon-like peptide-1                                                                                                                                                                                                                                                                                                        | Liraglutide (Victoza)             | Type 2 diabetes                     | Approved 2009                 |
| <b>Albumin chemical conjugates</b>                                                                                                                                                                                                                                                                                             |                                   |                                     |                               |
| Exendin-4                                                                                                                                                                                                                                                                                                                      | CJC-1134-PC                       | Type 2 diabetes                     | Phase II                      |
| * Albuferon, the interferon alpha-2b albumin fusion, was dropped from development in 2010 despite having met Phase III non-inferiority endpoints against Pegasys. It is not clear that immunogenicity of the fusion construct was involved, although poor tolerability compared to Pegasys was cited as a contributing factor. |                                   |                                     |                               |

Long-circulating biopharmaceuticals based on fusion with the IgG Fc domain

| Parent drug                                                  | Drug                                           | Indication                                                                                                                       | Commercial Stage    |
|--------------------------------------------------------------|------------------------------------------------|----------------------------------------------------------------------------------------------------------------------------------|---------------------|
| TNF receptor 2 (TNFR75)                                      | Etanercept (Enbrel)                            | Rheumatoid arthritis, ankylosing spondylitis, polyarticular juvenile idiopathic arthritis, psoriatic arthritis, plaque psoriasis | Approved 1998       |
| LFA-3                                                        | Alefacept (Amevive)                            | Severe chronic plaque psoriasis                                                                                                  | Approved 2003       |
| CTLA-4                                                       | Abatacept (Orenica)                            | Rheumatoid arthritis, juvenile idiopathic arthritis, psoriasis                                                                   | Approved 2005       |
| IL-1R                                                        | Rilonacept (Arcalyst)                          | Cryopyrin-associated periodic syndromes                                                                                          | Approved 2008       |
| Thrombopoietin binding peptide                               | Romiplostim (Nplate)                           | Chronic idiopathic thrombocytopenia purpura                                                                                      | Approved 2008       |
| VEGFR 1 + 2                                                  | Aflibercept (Eylea); ziv-aflibercept (Zaltrap) | Wet age-related macular degeneration; metastatic colorectal cancer                                                               | Approved 2011, 2012 |
| CTLA-4                                                       | Belatacept (Nulojix)                           | Prophylaxis of organ rejection in adults receiving a kidney transplant                                                           | Approved 2011       |
| Factor IX                                                    | rFIXFc (Alprolix)                              | Hemophilia B                                                                                                                     | Approved March 2014 |
| Factor VIII                                                  | rFVIII-Fc (Eloctate)                           | Hemophilia A                                                                                                                     | Approved June 2014  |
| sIL-4R                                                       | Altrakcept (Nuvance)                           | Asthma                                                                                                                           | Phase III           |
| Angiopoietin 1 and 2 binding peptide                         | Trebananib (AMG386)                            | Cancer (various)                                                                                                                 | Phase III           |
| B cell activating factor                                     | Blisibimod, A-623                              | Systemic lupus erythematosus                                                                                                     | Phase III           |
| TNFR55                                                       | Lenercept                                      | Rheumatoid arthritis, severe sepsis                                                                                              | Phase III           |
| Tumor necrosis factor receptor superfamily member 13B (TACI) | Atacept                                        | Systemic lupus erythematosus; multiple sclerosis                                                                                 | Phase II/III        |
| VEGFR 1 + 2                                                  | KH902                                          | AMD-associated choroidal neovascularization                                                                                      | Phase II            |
| CD4                                                          | PRO542                                         | HIV                                                                                                                              | Phase II            |
| Activin Receptor IIA extracellular domain                    | Sotatercept, ACE-011                           | Anemia                                                                                                                           | Phase II            |
| Soluble activin type IIB receptor                            | ACE-031                                        | Duchenne muscular dystrophy                                                                                                      | Phase II            |
| Cytotoxic T-lymphocyte antigen 4 (CTLA-4)                    | ASP2408                                        | Rheumatoid arthritis                                                                                                             | Phase II            |
| Lymphotoxic-beta receptor                                    | Baminercept alfa, BG-9924                      | Sjögren's Syndrome<br>Rheumatoid arthritis                                                                                       | Phase II            |
| Activin receptor-like kinase 1 (ALK1)                        | Dalantercept, ACE-041                          | Advanced renal cell carcinoma; advanced hepatocellular carcinoma; recurrent endometrial carcinoma                                | Phase II            |
| Recombinant P-selectin glycoprotein ligand                   | YPSL, TS-1                                     | Ischemia reperfusion injury                                                                                                      | Phase II            |
| Fibroblast growth factor receptor 1c                         | FP-1039, GSK3052230                            | Squamous non-small cell lung cancer; mesothelioma                                                                                | Phase I             |
| CD95 receptor extracellular domain                           | APG101                                         | Myelodysplastic syndromes Glioblastoma                                                                                           | Phase I             |

## Long-circulating biopharmaceuticals based on alternative genetic fusion approaches

| Parent drug                  | Drug                                   | Indication                                                                      | Commercial Stage |
|------------------------------|----------------------------------------|---------------------------------------------------------------------------------|------------------|
| Follicle stimulating hormone | Corifollitropin alfa, FSH-CTP (Elonva) | Controlled Ovarian Stimulation in women participating in in vitro fertilization | Approved 2010    |
| Human growth hormone         | Human growth hormone-XTEN, VRS-371     | Pediatric Growth Hormone Deficiency                                             | Phase II         |
| Human growth hormone         | hGH-CTP, MOD-4023                      | Pediatric Growth Hormone Deficiency                                             | Phase II         |
| GLP-1                        | GLP1-ELP, PB1023                       | Type 2 diabetes                                                                 | Phase II         |
| GLP-1                        | Exenatide-XTEN, VRS-859                | Type 2 diabetes                                                                 | Phase I          |

## References:

1. Jazayeri, J.A. & Carroll, G.J. in *Therapeutic Proteins* 157-188 (Wiley-VCH Verlag GmbH & Co. KGaA, 2012).
2. Kimchi-Sarfaty, C. et al. Building better drugs: developing and regulating engineered therapeutic proteins. *Trends in Pharmacological Sciences* **34**, 534-548 (2013).
3. Kontermann, R.E. Strategies for extended serum half-life of protein therapeutics. *Current Opinion in Biotechnology* **22**, 868-876 (2011).
4. Sleep, D., Cameron, J. & Evans, L.R. Albumin as a versatile platform for drug half-life extension. *Biochimica et Biophysica Acta (BBA) - General Subjects* **1830**, 5526-5534 (2013).
5. Rask-Andersen, M., Masuram, S. & Schiöth, H.B. The Druggable Genome: Evaluation of Drug Targets in Clinical Trials Suggests Major Shifts in Molecular Class and Indication. *Annual Review of Pharmacology and Toxicology* **54**, 9-26 (2014).
